# Supplementary material for: Autism and Sensory Processing Disorders: Shared White Matter Disruption in Sensory Pathways but Divergent Connectivity in Social-Emotional Pathways
Source: PLoS One. 2014 Jul 30;9(7):e103038. doi: 10.1371/journal.pone.0103038 (PMC4116166; doi:10.1371/journal.pone.0103038)
Supplement: Table S1 — Group differences of FA between the ASD and SPD cohorts in ASD-affected temporal tracts. P values are derived from one-tailed permutation tests for SPD FA > ASD FA. Bolded p values indicate significant differences after FDR correction. (XLSX) [file pone.0103038.s005.xlsx]

## Sheet: Sheet1
Tract	SPD mean FA ±	SD	ASD mean FA ±	SD	P-val
Fusiform - amygdala	0.3738 ±	0.0203	0.3546 ±	0.0177	0.0058
Fusiform - hippocampus	0.3558 ±	0.016	0.3469 ±	0.0156	0.0452
ILF	0.4028 ±	0.0164	0.4008 ±	0.0192	0.2846
IFOF	0.3893 ±	0.0128	0.3844 ±	0.0156	0.2014
