# Supplementary material for: Autism and Sensory Processing Disorders: Shared White Matter Disruption in Sensory Pathways but Divergent Connectivity in Social-Emotional Pathways
Source: PLoS One. 2014 Jul 30;9(7):e103038. doi: 10.1371/journal.pone.0103038 (PMC4116166; doi:10.1371/journal.pone.0103038)
Supplement: Table S2 — Group differences of FA in all tracts, excluding SPD subjects with SCQ>15. P values are derived from one-tailed permutation tests for TDC FA > SPD FA. Bolded p values indicate significant group differences after FDR correction. (XLSX) [file pone.0103038.s006.xlsx]

## Sheet: Sheet1
Tract	TDC mean FA ±	SD	SPD mean FA ±	SD	P-val
Fusiform - amygdala	0.3693 ±	0.0182	0.3746 ±	0.0195	0.791
Fusiform - hippocampus	0.3587 ±	0.0146	0.3562 ±	0.0143	0.306
Uncinate fasciculus	0.3429 ±	0.0156	0.3398 ±	0.0088	0.2618
ILF	0.4114 ±	0.0147	0.4034 ±	0.0175	0.0736
IFOF	0.3956 ±	0.0171	0.4034 ±	0.0135	0.874
PTR	0.4095 ±	0.0113	0.4037 ±	0.0186	0.1222
Dorsal visual stream	0.4155 ±	0.0147	0.4023 ±	0.0167	0.0092
Splenium of the CC	0.4658 ±	0.0161	0.4533 ±	0.0252	0.0434
PCR (occipital)	0.4194 ±	0.0123	0.4094 ±	0.0209	0.0464
PCR (parietal)	0.4182 ±	0.0093	0.4147 ±	0.019	0.2374
ACR	0.4182 ±	0.0091	0.415 ±	0.0166	0.228
ATR (orbitofrontal)	0.3623 ±	0.0137	0.3573 ±	0.0156	0.1582
ATR (rostral middle frontal)	0.3530 ±	0.0111	0.3453 ±	0.0113	0.0292
Genu of the CC (orbitofrontal)	0.4361 ±	0.0224	0.4263 ±	0.0229	0.116
Genu of the CC (rostral middle frontal)	0.4105 ±	0.0196	0.4007 ±	0.0224	0.092
